# Sarco/Endoplasmic Reticulum Ca<sup>2+</sup>-ATPases (SERCA) Contribute to GPCR-Mediated Taste Perception

Naoko Iguchi<sup>1</sup>, Tadahiro Ohkuri<sup>1</sup>, Jay P. Slack<sup>2</sup>, Ping Zhong<sup>2</sup>, Liquan Huang<sup>1\*</sup>

**1** Monell Chemical Senses Center, Philadelphia, Pennsylvania, United States of America, **2** Givaudan Flavors Corporation, Cincinnati, Ohio, United States of America

## Abstract

The sense of taste is important for providing animals with valuable information about the qualities of food, such as nutritional or harmful nature. Mammals, including humans, can recognize at least five primary taste qualities: sweet, umami (savory), bitter, sour, and salty. Recent studies have identified molecules and mechanisms underlying the initial steps of tastant-triggered molecular events in taste bud cells, particularly the requirement of increased cytosolic free Ca<sup>2+</sup> concentration ([Ca<sup>2+</sup>]<sub>c</sub>) for normal taste signal transduction and transmission. Little, however, is known about the mechanisms controlling the removal of elevated [Ca<sup>2+</sup>]<sub>c</sub> from the cytosol of taste receptor cells (TRCs) and how the disruption of these mechanisms affects taste perception. To investigate the molecular mechanism of Ca<sup>2+</sup> clearance in TRCs, we sought the molecules involved in [Ca<sup>2+</sup>]<sub>c</sub> regulation using a single-taste-cell transcriptome approach. We found that Serca3, a member of the sarco/endoplasmic reticulum Ca<sup>2+</sup>-ATPase (SERCA) family that sequesters cytosolic Ca<sup>2+</sup> into endoplasmic reticulum, is exclusively expressed in sweet/umami/bitter TRCs, which rely on intracellular Ca<sup>2+</sup> release for signaling. Serca3-knockout (KO) mice displayed significantly increased aversive behavioral responses and greater gustatory nerve responses to bitter taste substances but not to sweet or umami taste substances. Further studies showed that Serca2 was mainly expressed in the T1R3-expressing sweet and umami TRCs, suggesting that the loss of function of Serca3 was possibly compensated by Serca2 in these TRCs in the mutant mice. Our data demonstrate that the SERCA family members play an important role in the Ca<sup>2+</sup> clearance in TRCs and that mutation of these proteins may alter bitter and perhaps sweet and umami taste perception.

**Citation:** Iguchi N, Ohkuri T, Slack JP, Zhong P, Huang L (2011) Sarco/Endoplasmic Reticulum Ca<sup>2+</sup>-ATPases (SERCA) Contribute to GPCR-Mediated Taste Perception. *PLoS ONE* 6(8): e23165. doi:10.1371/journal.pone.0023165

**Editor:** Hiroaki Matsunami, Duke University, United States of America

**Received:** January 25, 2011; **Accepted:** July 13, 2011; **Published:** August 2, 2011

**Copyright:** © 2011 Iguchi et al. This is an open-access article distributed under the terms of the Creative Commons Attribution License, which permits unrestricted use, distribution, and reproduction in any medium, provided the original author and source are credited.

**Funding:** This work was in part supported by Givaudan Flavors Corporation (<http://www.givaudan.com/>) and by grants from National Institutes of Health/ National Institute on Deafness and Other Communication Disorders (DC007487 to L.H.) (<http://www.nidcd.nih.gov/>) and from the National Science Foundation (DBJ-0216310 to N. Rawson) (<http://www.nsf.gov/>). The funders had no role in study design, data collection and analysis, decision to publish, or preparation of the manuscript. No additional external funding received for this study.

**Competing Interests:** NI and LH have declared that no competing interests exist. JPS and PZ are employees of Givaudan Flavors Corp. This does not alter the authors' adherence to all the PLoS ONE policies on sharing data and materials.

\* E-mail: [lh Huang@monell.org](mailto:lh Huang@monell.org)

## Introduction

The sense of taste is important to animal survival and growth; it not only plays a critical role in determining what should be ingested but also generates hedonic valence that can significantly affect an animal's mood and mental activity [1]. Vertebrates, including humans, can recognize at least five primary taste qualities: sweet, umami, bitter, sour, and salty [2]. The interaction between the taste substances and receptors on the apical surface of taste bud cells initiates taste sensation, and the output signal from taste bud cells is relayed to the central nervous system via afferent gustatory nerves.

Each taste bud consists of a small number of basal cells, which are presumed to be progenitor cells, and a heterogeneous population of 50–100 elongated cells that are classified as type I, II, or III based on their morphological, biochemical, and physiological properties [3]. Type I cells are suggested to be salt-taste-sensing cells, in addition to the long-standing presumption of a supportive function in the taste bud similar to that of glial cells in the nervous system [4,5,6,7].

Type II cells, also called taste “receptor” cells (TRCs), express molecular machinery for taste transduction for sweet, umami, and bitter, including G-protein-coupled taste receptors (GPCRs) and

downstream effectors. Sweet and umami tastes are mediated by TRCs expressing GPCRs belonging to the T1R family: T1R2+T1R3 for sweet and T1R1+T1R3 for umami [8,9,10,11,12]. Bitter taste is mediated by another set of GPCRs, the T2R family [13,14,15,16]. Activation of T1R or T2R receptors stimulates G-proteins, which in turn activate phospholipase C (PLC) β2, leading to the production of the second messengers inositol-1,4,5-triphosphate (IP<sub>3</sub>) and diacylglycerol [17,18,19]. IP<sub>3</sub> binds to its receptor, IP<sub>3</sub>R3, allowing the endoplasmic reticulum (ER) to release Ca<sup>2+</sup>, which increases cytosolic free Ca<sup>2+</sup> concentrations ([Ca<sup>2+</sup>]<sub>c</sub>), triggering the opening of Trpm5 (transient receptor potential cation channel, subfamily M, member 5) [17,20,21]. Na<sup>+</sup> influx through Trpm5 depolarizes the membrane potential, which leads to release of ATP onto gustatory afferent nerve fibers via hemichannels [22,23,24].

Type III cells, also called “presynaptic” cells, form prominent synapses with afferent nerve fibers and exhibit depolarization-dependent secretion of serotonin and norepinephrine; these cells are also responsible for sour taste sensation [25,26,27,28,29,30]. Although the signal transduction mechanisms for sour and salty taste qualities are not fully understood, studies have demonstrated that sour and salty taste stimuli also lead to increases in [Ca<sup>2+</sup>]<sub>c</sub> in responding taste cells [5,27,31]. Therefore, regardless of the modality of a taste substance, the activation of different taste signal

transduction pathways eventually converges at increases in  $[Ca^{2+}]_c$ , suggesting the importance of  $Ca^{2+}$  in taste signal transduction and transmission.

To utilize  $Ca^{2+}$  effectively as a signaling molecule, taste cells must tightly regulate  $[Ca^{2+}]_c$  at both increasing and decreasing steps. Disruption of the exquisite  $[Ca^{2+}]_c$  regulation in taste cells could cause nonspecific or inappropriate responses and, in severe cases, lead to cell death because of adverse effects of high  $[Ca^{2+}]_c$  [32]. Thus, taste cells must have mechanisms to clear  $Ca^{2+}$  from cytosol to ensure the effectiveness of intracellular  $Ca^{2+}$  signaling mechanisms. To date, although many studies have focused on  $[Ca^{2+}]_c$  elevation,  $Ca^{2+}$  clearance mechanisms in taste cells—how taste cells deplete  $Ca^{2+}$  from cytoplasm and restore  $[Ca^{2+}]_c$  to prestimulation levels—are not well understood [17,20,33,34,35,36]. Recent reports indicate that  $Na^+/Ca^{2+}$  exchangers and mitochondrial  $Ca^{2+}$  transporters clear  $Ca^{2+}$  in presynaptic taste bud cells that express voltage-gated  $Ca^{2+}$  channels (VGCCs) [34,35,37,38,39,40,41]. The  $Ca^{2+}$  clearance mechanisms utilized by other types of taste cells, however, remain to be determined; moreover, how  $Ca^{2+}$  clearance mechanisms affect taste detection *in vivo* needs to be characterized.

In the present study, we hypothesized that different types of taste bud cells may employ different mechanisms in the restoration of  $[Ca^{2+}]_c$  following responses to taste stimuli to reset the cells for the next taste stimulus. To test this hypothesis, we generated and analyzed rat subtracted single-TRC cDNA libraries, and identified one of the sarco/endoplasmic reticulum  $Ca^{2+}$ -ATPase (SERCA) family genes, *Serca3* (*Atp2a3*) [42], that is expressed exclusively in sweet/umami/bitter TRCs. *Serca3*-knockout (KO) mice showed altered behavioral and gustatory nerve responses to bitter substances. In addition, we also found that another SERCA family member, *Serca2*, is largely expressed in T1R3-expressing taste bud cells and may compensate for the *Serca3* loss of function in the mutant taste buds. Taken together, our results illustrate that unique sets of  $Ca^{2+}$  clearance proteins are utilized by different types of taste bud cells, and that malfunction of these proteins can alter taste perception.

## Results

### Mammalian taste papillae express *Serca3* cDNAs

To identify unique molecules possibly involved in  $[Ca^{2+}]_c$  homeostasis in TRCs, we isolated individual taste bud cells from rat circumvallate (CV) and foliate papillae and reverse transcribed and amplified all transcripts from these single cells. A portion of the amplified single-cell transcriptomes was used for *post hoc* gene expression profiling by quantitative real-time PCR (qPCR) with primers listed in Table S1 for the following cell-type marker genes: *Entpd2* for type I cells, *Trpm5* for type II TRCs, *Tas1r1* for umami TRCs, *Tas1r2* for sweet TRCs, and *Snap25* for type III/presynaptic cells. Another portion of the remaining amplified products for TRCs was subtracted with cDNA for type I cells to facilitate the isolation of genes specifically or more abundantly expressed in TRCs than in type I taste bud cells. The subtracted cDNAs were further amplified, subcloned into plasmid vectors, and sequenced. A BLAST search of the insert DNA sequences against the GenBank database indicated that one clone, A14, completely matched a 0.3-kb segment of the 3' end of the rat *Serca3a* sequence, a splice variant of sarco/endoplasmic reticulum  $Ca^{2+}$ -ATPase 3 (*Serca3/Atp2a3*, GenBank accession number NM\_012914.1) [42].

Previous studies have shown that rodents and humans express splice variants that differ at the C-terminus: all variants except *Serca3a*, which is present in all human and rodent species, are species specific [43]. To investigate which isoform is expressed in

rat and mouse taste tissue, we performed reverse-transcription PCR (RT-PCR) with variant-specific primer sets (Table S2). All known *Serca3* isoforms—two in rats (*Serca3a* and *3b/c*) and three in mice (*Serca3a*, *3b*, and *3c*)—were detected in taste papillae (T), but not in lingual epithelium devoid of taste buds (N) (Fig. 1). To isolate the full-length coding cDNAs, sets of PCR primers were designed to cover the entire coding sequences (Table S2). PCR with the first-strand cDNAs from rat and mouse CV and foliate taste papillae, and subsequent insert DNA sequencing analysis, revealed no additional splice variants, and the full-length coding sequences for all mouse and rat isoforms except mouse *Serca3c* were detected.

### Sweet/umami/bitter TRCs express *Serca3* proteins

To investigate *Serca3* expression in taste papillae at the protein level, we performed immunohistochemistry against mouse lingual tissue sections with an antibody that recognizes all *Serca3* isoforms. The robust signals were detected in a large subset of mouse taste bud cells obtained from four different oral taste fields (CV, foliate, and fungiform papillae and soft palate) (Fig. 2). Immunoreactivity extended throughout the cytoplasm of the labeled taste bud cells, which was not detected in taste tissues from *Serca3* knockout (KO) mice, validating the specificity of the antibody as well as the absence of *Serca3* proteins in the mutant mice (see below).

Next, we explored which type of cells express *Serca3* protein in taste buds by using anti-*Serca3* antibody to immunostain taste papillae from two different transgenic mouse lines that expressed green fluorescent protein (GFP) under the promoter of either *Trpm5* (*Trpm5*-GFP) or glutamic acid decarboxylase 1 (*Gad1*-GFP). The GFP expression of these two transgenic lines in sweet/umami/bitter TRCs and in the majority of presynaptic cells, respectively, was previously verified [31,40,44], and further confirmed by our immunocytochemical studies with antibodies against PLC $\beta$ 2, *Trpm5*, and dopa decarboxylase (DDC), another marker for presynaptic cells [17,45,46] (data not shown). We found nearly perfect overlap of cell populations exhibiting GFP fluorescence and *Serca3* immunoreactivity in the *Trpm5*-GFP mice, suggesting that *Trpm5* and *Serca3* are fully co-expressed in TRCs (Fig. 3, upper panels). In the contrast, *Serca3* antibody staining on taste tissue sections of *Gad1*-GFP transgenic mice

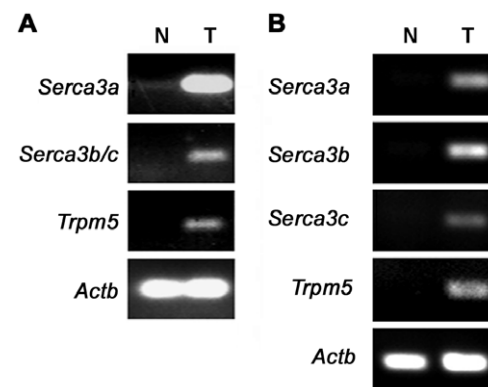

**Figure 1. Selective expression of *Serca3* splice variants in rat and mouse gustatory lingual epithelium.** RT-PCR was performed with variant-specific primers, and RNA samples were prepared from rat (A) and mouse (B) taste-bud-containing papillae (T) or lingual epithelium devoid of taste buds (N). All known variants were detected. PCR reactions for *Trpm5*, a taste-specific marker, and  $\beta$ -actin (*Actb*), a general “housekeeping” gene, were included as controls. doi:10.1371/journal.pone.0023165.g001

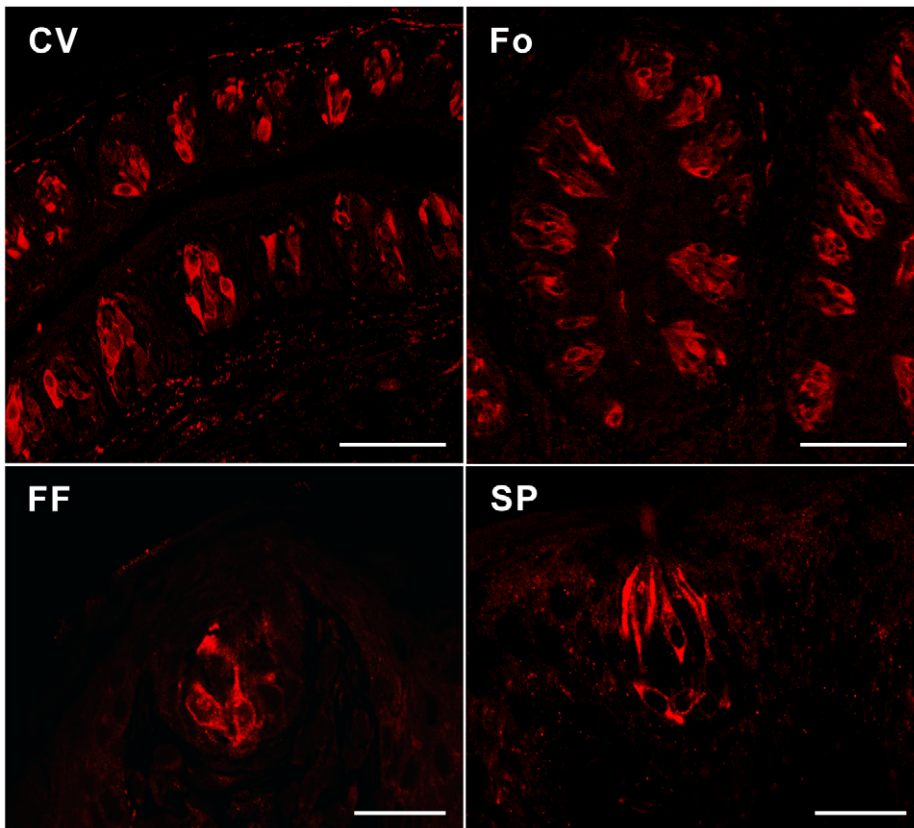

**Figure 2. Expression of Serca3 protein in taste buds.** Immunofluorescence images of mouse circumvallate (CV), foliate (Fo), fungiform (FF), and soft palate (SP) sections stained with the anti-Serca3 antibody show that immunoreactivity was detected in a subset of taste bud cells from all four major taste fields. Scale bars: 50  $\mu$ m in CV and Fo, 25  $\mu$ m in FF and SP. doi:10.1371/journal.pone.0023165.g002

displayed mutually exclusive patterns (Fig. 3, lower panels), indicating that Serca3 is not expressed in the presynaptic cells. Taken together, these results show the specific expression of Serca3 in TRCs, suggesting a possible role for Serca3 in sweet/umami/bitter taste sensation.

#### Normal morphology and expression of taste-related proteins in Serca3 KO taste tissues

To characterize the possible function of Serca3 in taste bud structure and physiology, we first examined the expression of several taste-related proteins and taste bud morphology in Serca3 KO mice [47]. The lingual epithelium and taste buds of the mutant mice appeared grossly normal. Immunostaining of the mutant taste buds with anti-Serca3 antibody detected no specific signals, verifying the lack of Serca3 protein expression in the KO mice. Immunohistochemical studies showed no obvious abnormalities in expression of the taste-signaling components T1R3,  $\alpha$ -gustducin, PLC $\beta$ 2, Trpm5, and neural cell adhesion molecule (NCAM) in the mutant taste buds (Fig. 4).

#### Increased behavioral responses to bitter taste in Serca3 KO mice

To characterize behavioral responses of the Serca3 KO mice to tastants, we performed 48-h two-bottle preference tests with compounds representative of five primary taste qualities: sweet (caloric sucrose and the noncaloric artificial sweetener sodium saccharin), umami (monosodium L-glutamate or MSG), bitter (denatonium and quinine hydrochloride), sour (citric acid), and

salty (NaCl). Data analysis indicated that there were no statistically significant differences between the wild-type (WT) and KO mice in the preference scores to sweet and umami taste stimuli, although the KO mice tended to display higher preference scores for the compounds at lower concentrations than did WT mice (Fig. 5A–C, Table S4). Interestingly, our data showed that mice deficient for Serca3 displayed significantly increased aversive responses to the bitter substances compared with WT mice (Fig. 5D and E, Table S4). We found no significant difference in the preference to ionic taste stimuli (sour and salty tastes) between the WT and KO mice (Fig. 5F and G, Table S4).

We also carried out a brief-access procedure, which was designed to minimize possible postingestive effects. The results also showed that there were no significant differences between the responses of Serca3 KO and WT controls ( $n = 7$  for each genotype) for the sweet and umami tastants (Fig. 6, Table S4), but there was a trend towards higher preference in KO mice for these palatable stimuli (Fig. 6A and B), as we observed in two-bottle preference tests (Fig. 5A–C). The behavioral responses of Serca3 KO mice to sour (citric acid) and salty (NaCl) taste substances were indistinguishable from those of the control WT mice (Fig. 6E and F). In contrast, KO mice displayed significantly increased avoidance of the bitter-tasting compound, denatonium at 0.1 mM, the lowest concentration we tested (Fig. 6C). For higher concentrations of denatonium (0.3 and 1 mM) and for another bitter-tasting substance, quinine (0.05, 0.25, and 1 mM), KO mice also seemed to exhibit increased avoidance responses, although the increases were statistically insignificant (Fig. 6C and D, Table S4).

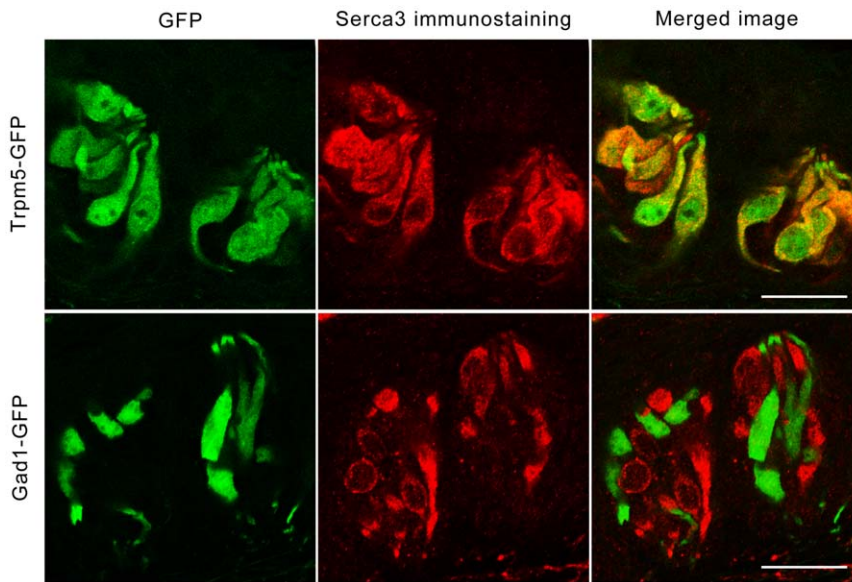

**Figure 3. Serca3 protein is found in Trpm5- but not Gad1-expressing cells.** Confocal images of CV taste papillae sections show the fluorescence of GFP (green, left) expressed under the control of Trpm5 (upper panels) or Gad1 (lower panels) promoters, labeling sweet/umami/bitter TRCs and most presynaptic cells, respectively, and the immunostaining with the anti-Serca3 antibody (red, center panels). The merged images show near-perfect overlap (yellow-orange) in Trpm5-GFP mice (upper right) but no overlap in Gad1-GFP mice (lower right). Scale bars, 25  $\mu$ m. doi:10.1371/journal.pone.0023165.g003

#### Increased gustatory nerve responses to bitter tastants in Serca3 KO mice

To determine whether the augmented behavioral responses of Serca3 KO mice to bitter compounds were attributable to the deficiency in the peripheral gustatory system, we performed electrophysiological recordings of the gustatory nerve with taste stimuli. We recorded from the glossopharyngeal nerve since it innervates taste buds in the posterior part of the tongue, in which

the bitter taste receptors are more abundantly expressed [13]. Consistent with the behavioral data described above, the nerve responses in Serca3 KO mice to bitter taste stimuli (denatonium and quinine) were significantly increased compared with those of the WT mice (Fig. 7, Table S4). In contrast, we observed no significant differences between KO mice and WT mice in the nerve responses to sweet, umami, sour, and salty tastes (Fig. 7A and C, Table S4).

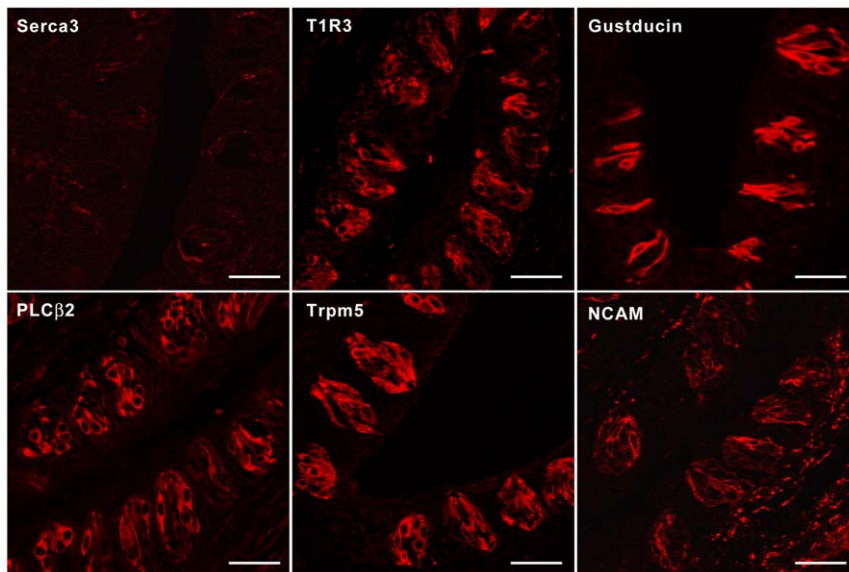

**Figure 4. Normal taste bud morphology and expression of taste-signaling molecules in Serca3 KO mice.** Immunofluorescence images of Serca3-KO mouse circumvallate taste tissue sections with antibodies against Serca3, T1R3,  $\alpha$ -gustducin, PLC $\beta$ 2, Trpm5, and neural cell adhesion molecule (NCAM) indicate that Serca3 protein was absent in taste buds, whereas the expression of other proteins appeared unaltered. Scale bars, 25  $\mu$ m. doi:10.1371/journal.pone.0023165.g004

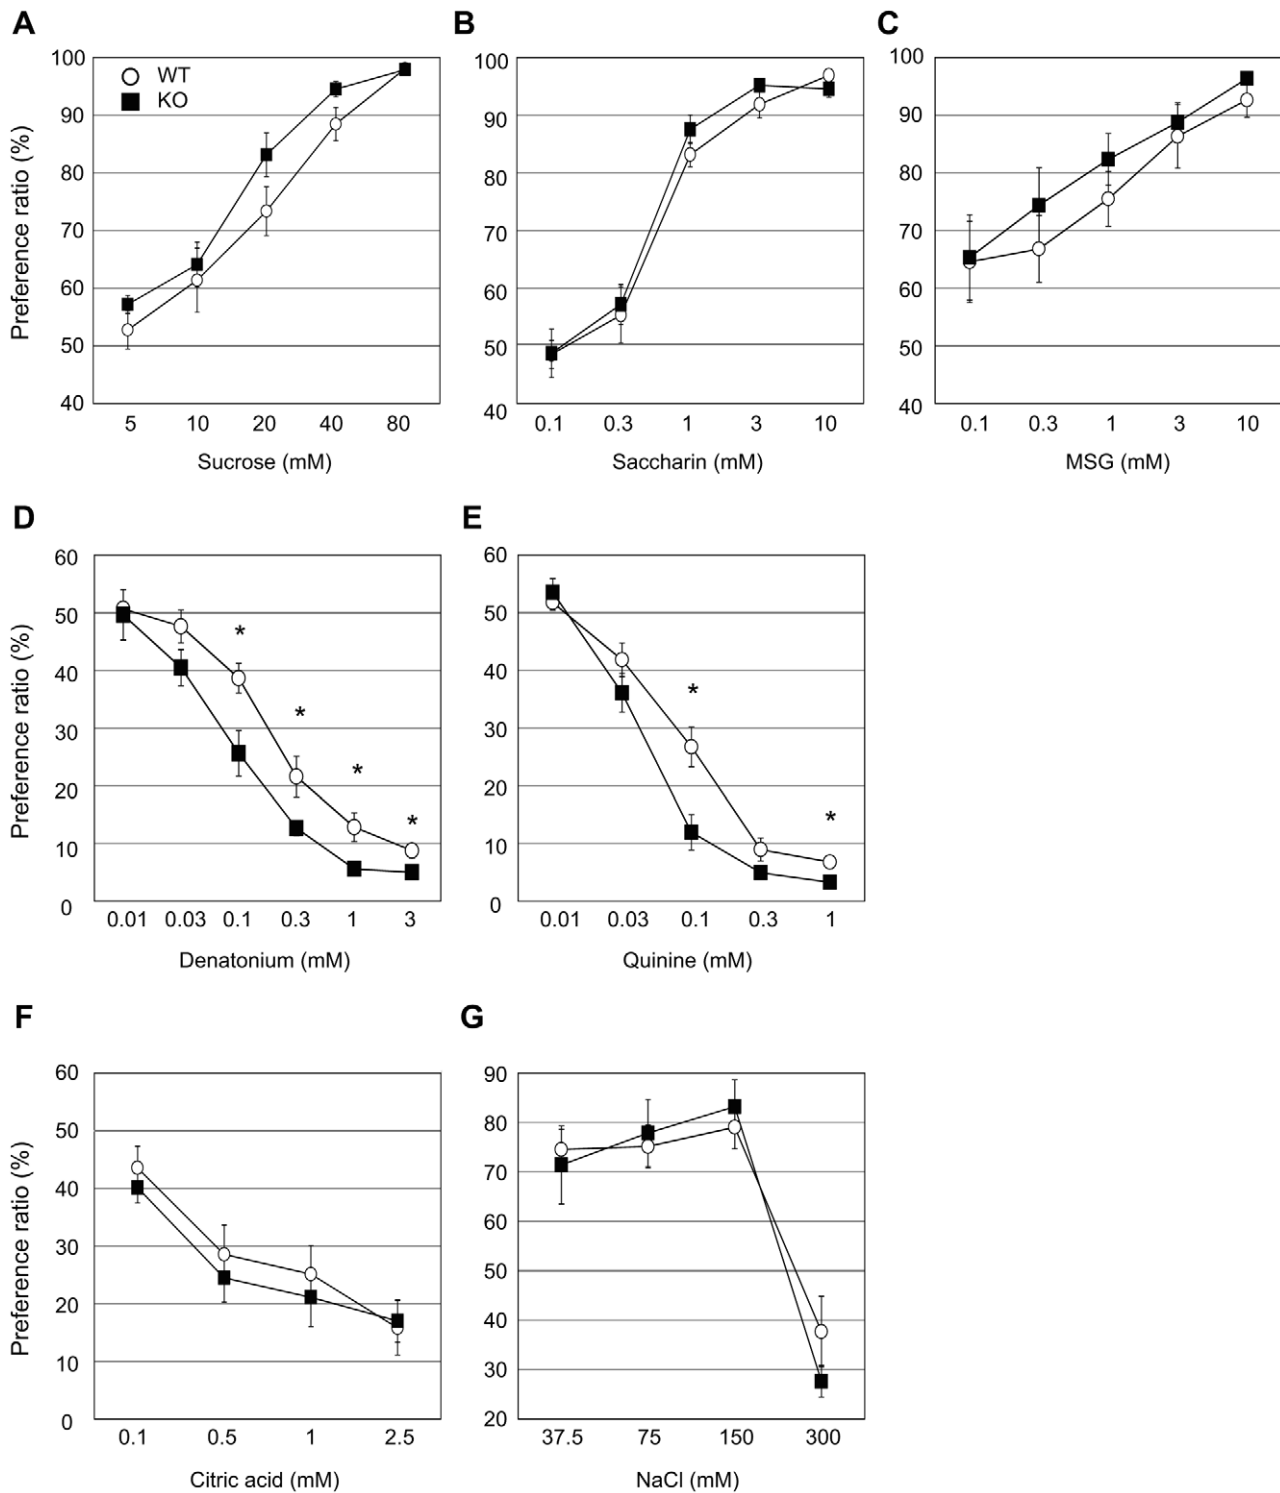

**Figure 5. Mean taste preference ratios of WT and *Serca3* KO mice using two-bottle preference tests.** Taste responses are expressed as taste/water intake ratios of *Serca3* KO (filled squares) and WT (open circles) to (A) sucrose, (B) saccharin, (C) monosodium glutamate (MSG), (D) denatonium, (E) quinine, (F) citric acid, and (G) NaCl. Data are means  $\pm$  SEMs ( $n = 9-10$ , except  $n = 5$  for KO mice for NaCl tests). Mixed-model ANOVA and *post hoc t*-tests were performed ( $*p < 0.05$ ). doi:10.1371/journal.pone.0023165.g005

### *Serca2* is co-expressed with T1R3

To investigate the differential effect of *Serca3* gene nullification on the taste responses to bitter substances versus sweet and umami compounds, we reasoned that other functionally related proteins

such as another member of the SERCA family might compensate in part for *Serca3*'s absence in the KO mice. RT-PCR showed that *Serca2* is expressed in mouse lingual epithelia bearing CV and foliate taste papillae, but *Serca1* is not (data not shown).

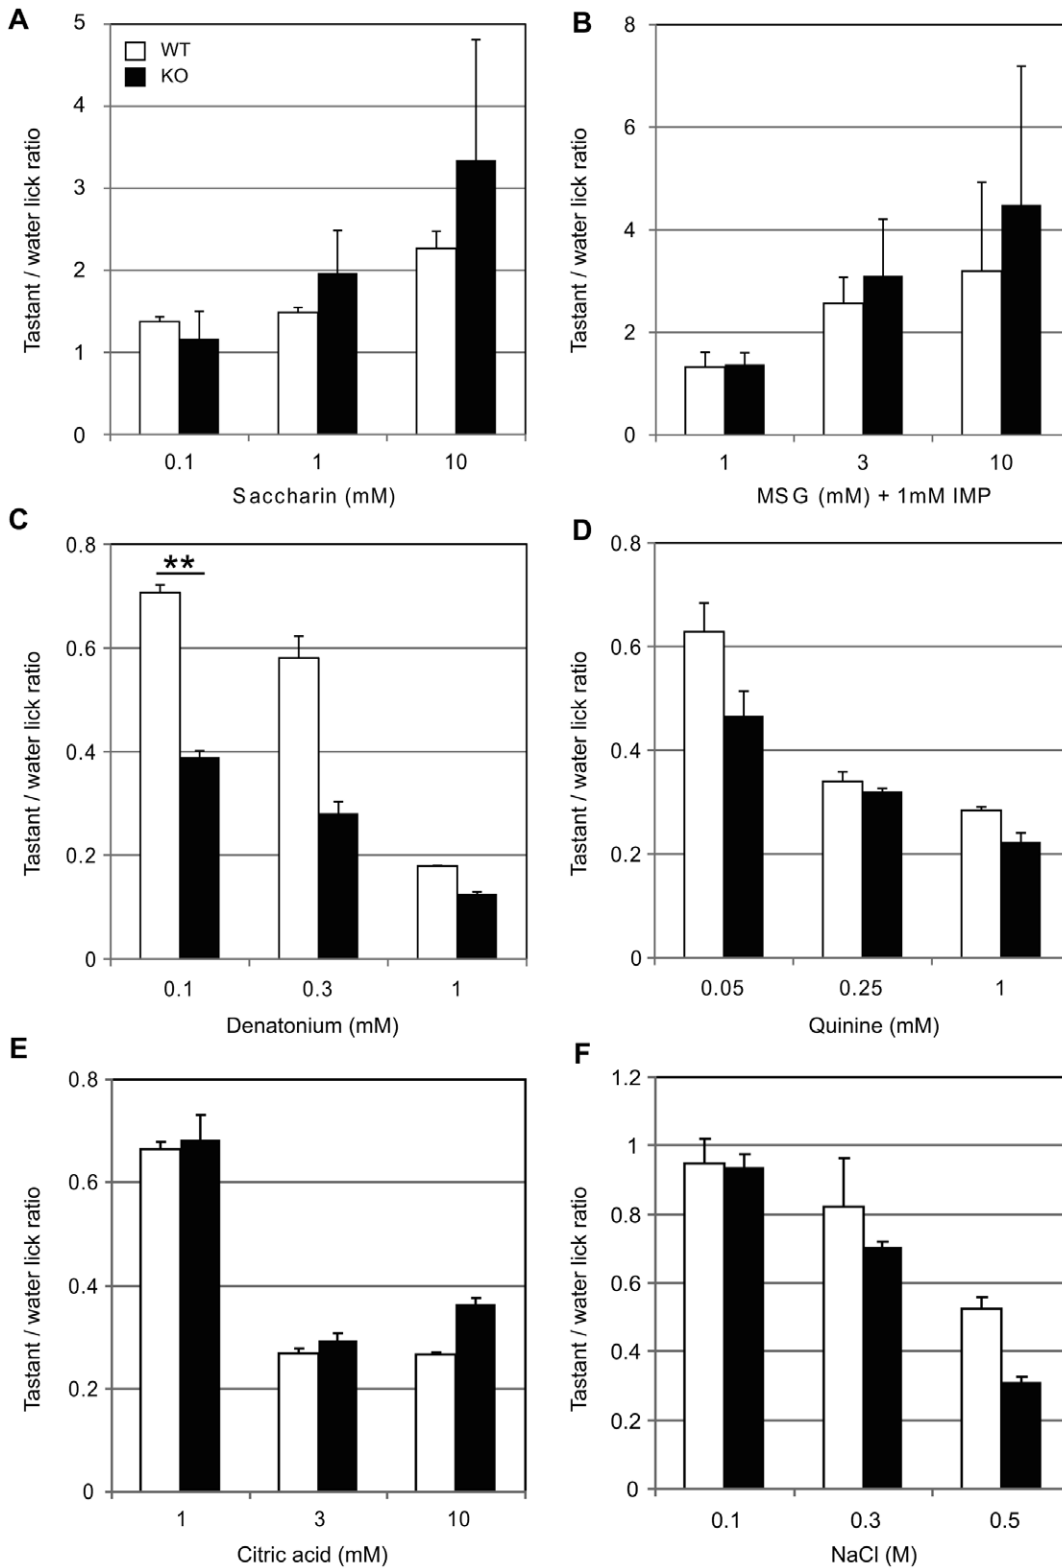

**Figure 6. Altered taste responses of *Serca3* KO mice in brief-access taste tests.** Taste preferences of WT and *Serca3* KO animals were measured relative to water using a brief-access taste test. Taste responses are expressed as taste/water lick ratios of *Serca3* KO (filled bars) and WT (open bars) mice to (A) saccharin, (B) MSG in the presence of 100  $\mu$ M amiloride and 1 mM IMP, (C) denatonium, (D) quinine, (E) citric acid, and (F) NaCl. Data are means  $\pm$  SEMs (n=7). Mixed-model ANOVA and *post hoc* *t*-tests were performed (\*\*p<0.01). doi:10.1371/journal.pone.0023165.g006

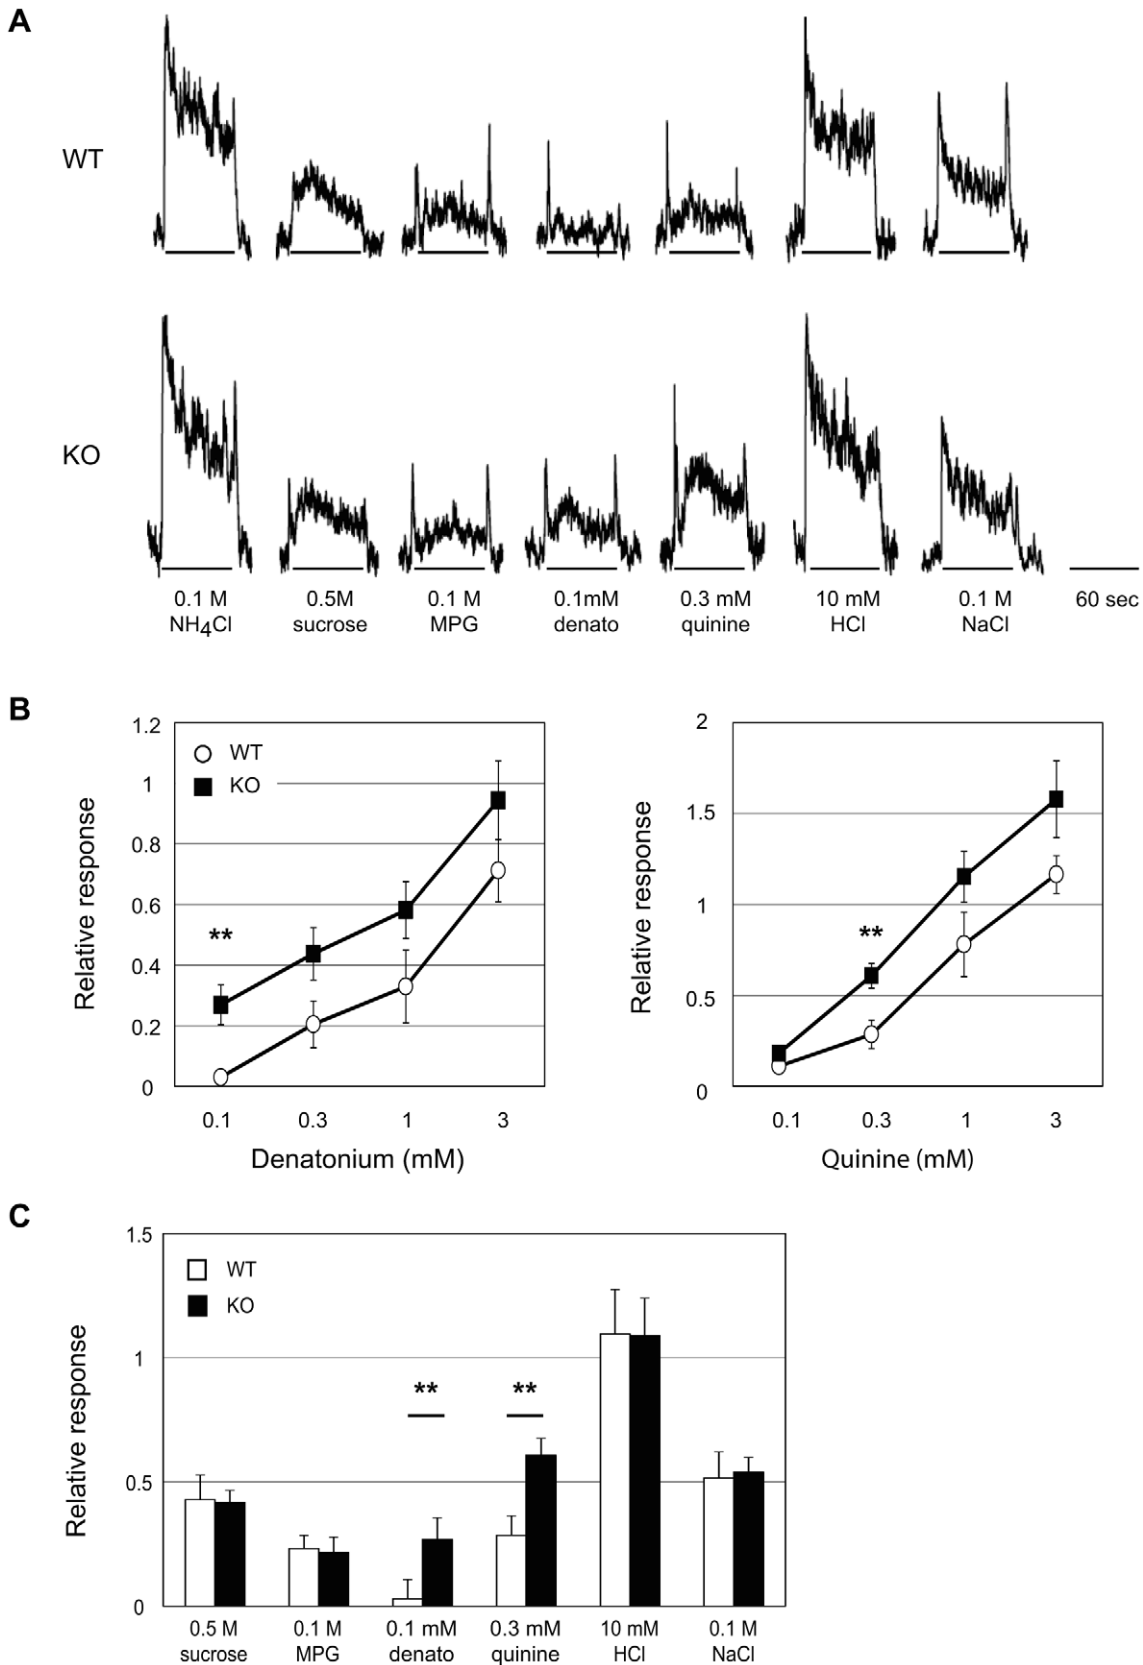

**Figure 7. Whole-nerve recordings from the glossopharyngeal nerves of WT and *Serca3* KO mice upon taste stimuli.** (A) Representative responses of the glossopharyngeal nerves to the taste substances: sweet (0.5 M sucrose), umami (0.1 M MPG), bitter (0.1 mM denatonium (denato) and 0.3 mM quinine), sour (10 mM HCl), and salty (0.1 M NaCl). The responses to 0.1 M NH<sub>4</sub>Cl were used as reference for data analysis. The robust responses to bitter-tasting substances were recorded from the *Serca3* KO mice versus WT mice. (B) Concentration–response curves to the bitter taste

compounds denatonium (left) and quinine (right) indicated the significantly increased nerve responses to 0.1 mM denatonium and 0.3 mM quinine obtained from *Serca3* KO mice (filled squares) compared with those of WT mice (open circles). (C) Integrated neural responses, such as those shown in (A), were normalized to the response elicited by 0.1 M  $\text{NH}_4\text{Cl}$ . No significant difference in the nerve responses to sweet, umami, sour, and salty tastes is apparent between WT mice (open bars) and KO mice (filled bars). Data are means  $\pm$  SEMs ( $n=6-8$ ). Mixed-model ANOVA and *post hoc* *t*-tests were performed (\*\* $p<0.01$ ).

doi:10.1371/journal.pone.0023165.g007

Immunocytochemical results indicated that, unlike immunostaining with *Serca3* antibody, which was distributed throughout the taste cell body, *Serca2* staining was punctuate and localized to limited cytoplasmic regions, in many cases the area apical to the nucleus (Fig. 8). To determine which types of taste cells express *Serca2*, we performed double-label immunohistochemistry on rat CV taste epithelia with antibody to *Serca2* along with the antibodies recognizing *Trpm5*,  $\alpha$ -gustducin, or *T1R3* protein. Since the anti-*Serca2* antibody was generated in mice, we used taste tissue sections from rat instead of mouse to eliminate possible intrinsic background staining in the mouse tissue. We found that (1) *Trpm5* and *Serca2* signals were largely overlapping, but a few cells expressed *Trpm5* only; (2) many cells expressed both *Serca2* and  $\alpha$ -gustducin, but some cells expressed only one or the other; and (3) nearly all *Serca2*-expressing cells expressed *T1R3* (Fig. 8). Together, these data indicate that *Serca2* is expressed mainly in a subpopulation of *Trpm5*/*T1R3*-expressing cells, suggesting that it is likely to contribute to sweet and umami taste sensation.

## Discussion

In this study, we performed transcriptomic screen of single taste bud cells by subtracting cDNA of type I cells from that of TRCs to facilitate the isolation of genes specifically or more abundantly expressed in TRCs than in type I taste bud cells. Among these differentially expressed genes, we identified *Serca3*, a member of SERCA family that encodes a molecular pump known to actively transport  $\text{Ca}^{2+}$  from the cytosol into the ER. Three genes, *ATP2A1*, 2, and 3, encode SERCA 1, 2, and 3 transcripts, which produce various isoforms in a species-, tissue-, and developmental stage-specific manner [43]. In taste tissue of adult rodents, we used splice variant-specific PCR primers and detected transcripts for all known *Serca3* variants: two rat variants (*Serca3a* and *3b/c*) and three mouse variants (*Serca3a*, *3b*, and *3c*). With the primers covering the entire coding sequences, we also isolated the transcripts for all variants except mouse *Serca3c*, and as the variant-specific PCR data (Fig. 1) indicated, the failure to amplify

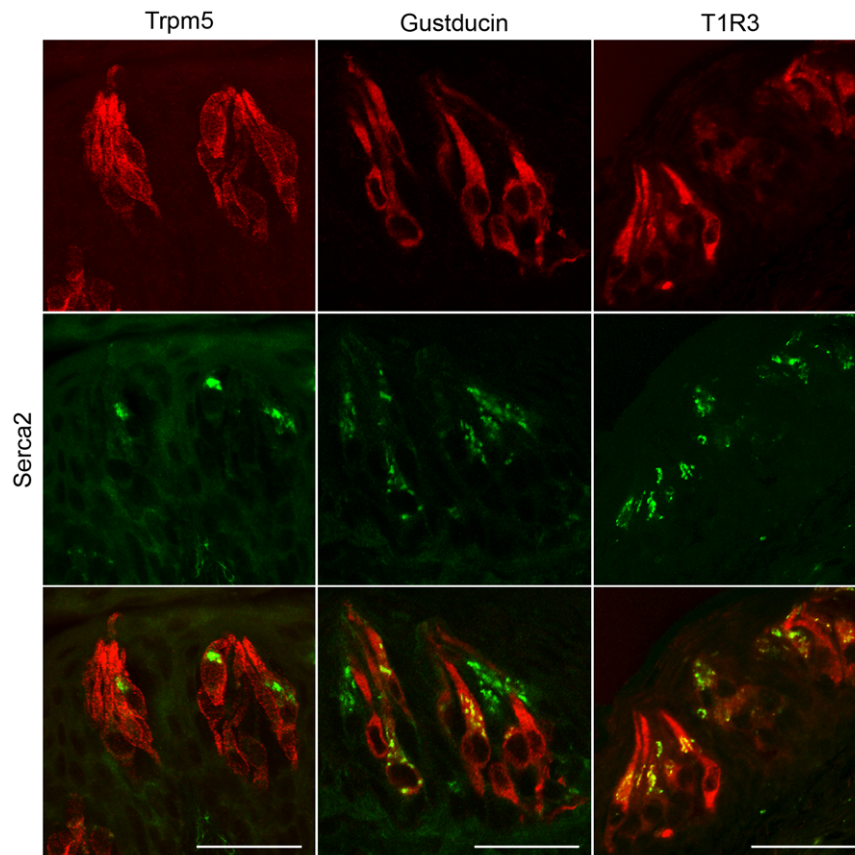

**Figure 8. *Serca2* is expressed in sweet and umami taste receptor cells.** Rat circumvallate papilla sections were double immunostained with anti-*Serca2* antibody (green) and with antibodies against *Trpm5* (left panels),  $\alpha$ -gustducin (middle panels), or *T1R3* (right panels) (red). Overlay of the immunofluorescence images (bottom row) showed that *Serca2* was expressed mainly in a subpopulation of *Trpm5*/*T1R3*-expressing cells, and, to a lesser extent, in  $\alpha$ -gustducin-expressing cells. Scale bars, 25  $\mu\text{m}$ .

doi:10.1371/journal.pone.0023165.g008



*Serca3c* full-length coding sequence was likely due to its low expression level in taste buds. The presence of multiple *Serca3* isoforms may allow taste bud cells to precisely regulate their focal and/or global  $\text{Ca}^{2+}$  signals in a cell-specific manner. For example, a previous study showed that some human SERCA3 protein isoforms have distinct  $\text{Ca}^{2+}$  pumping properties but similar affinities toward  $\text{Ca}^{2+}$  [48]. Further investigation into the exact distribution of each *Serca3* isoform among different types of taste bud cells can provide additional information on the fine control of  $\text{Ca}^{2+}$  signals in these cells.

Immunohistochemical studies with an antibody that recognizes all known *Serca3* isoforms in mice showed that a subset of taste bud cells from all examined taste tissue—CV, foliate, and fungiform papillae and soft palate—express this  $\text{Ca}^{2+}$  pump, whereas extragemmal epithelial cells showed no detectable signals (Fig. 2). Further, *Serca3*-expressing taste bud cells are the same as those expressing *Trpm5* but different from those expressing *Gad1* (Fig. 3), indicating that *Serca3* protein is expressed exclusively in sweet/umami/bitter TRCs but not in presynaptic cells.

Functionally, the activation of sweet, umami, and bitter taste receptors eventually leads to the  $\text{Ca}^{2+}$  release from the ER into the cytosol. The increased cytosolic  $\text{Ca}^{2+}$  opens the *Trpm5* channel, resulting in the depolarization of the receptor membrane potential and release of the transmitters onto the afferent nerve fibers. The *Serca3* pump may not be active in the resting TRCs because the apparent  $\text{Ca}^{2+}$  affinity of *Serca3* is low, with a  $K_{0.5}$  of  $\sim 1.1 \mu\text{M}$ , and the normal basal  $[\text{Ca}^{2+}]_c$  is about  $0.1 \mu\text{M}$ , well below its  $K_{0.5}$  [37,48,49,50]. Once activated by the rising  $[\text{Ca}^{2+}]_c$ , however, *Serca3* has a high uptake rate [49], and is able to sequester  $\text{Ca}^{2+}$  back into the ER, which modulates the net amount of  $[\text{Ca}^{2+}]_c$  and affects downstream signal transduction. The events also could lead to the termination of taste signal transduction. The complete co-expression of *Serca3* and *Trpm5* in TRCs suggests that *Serca3* functions to reverse increased  $[\text{Ca}^{2+}]_c$  induced by sweet, umami, and bitter taste-receptor-mediated PLC $\beta$ 2-IP $_3$ R3 signaling. The sequestration of  $\text{Ca}^{2+}$  also enables TRCs to maintain a constant net total amount of  $\text{Ca}^{2+}$  within a cell (cytoplasm+cellular organelle) over a long period. This mechanism seems to differ from that used by presynaptic cells, which depend on  $\text{Ca}^{2+}$  influx to initiate synaptic transmission and utilize  $\text{Na}^+/\text{Ca}^{2+}$  exchangers to transport  $\text{Ca}^{2+}$  across the plasma membrane back into the extracellular space [38,39].

To demonstrate for the first time how malfunction of the  $\text{Ca}^{2+}$  clearance mechanism affects taste perception, we analyzed the behavioral responses of mice lacking *Serca3* to tastants representative of five primary taste qualities (Figs. 5 and 6). The deficiency of *Serca3* did not affect the animals' preferences for various concentrations of sour and salty stimuli, which agrees with our immunostaining data showing no expression of *Serca3* in presynaptic cells or in cells other than TRCs. In tests with sweet, umami, and bitter taste stimuli, we observed significant differences between the KO and WT mice in aversive responses to the bitter taste substances denatonium (Figs. 5D and 6C) in both the 48-h two-bottle preference assays and brief-access tests and to quinine in the brief-access tests (Fig. 5E). Although statistically insignificant, the KO mice appeared to display an increased aversion to quinine as well, compared with WT mice (Fig. 6D) in brief-access tests.

Electrophysiological data from the gustatory nerve responses indicate that the altered behavioral responses to bitter taste in *Serca3* KO mice are contributable to the deficiency in the peripheral taste system (Fig. 7). Electrical recordings from the glossopharyngeal nerve that innervates the taste buds with relatively abundant expression of bitter taste receptors showed

significantly stronger responses for bitter taste compounds in *Serca3* KO mice than in WT control mice, whereas the responses to sweet, umami, salty, and sour substances were indistinguishable between these two groups of mice.

Intriguingly, the *Serca3* gene deletion seemed to have no significant effect on preference or gustatory nerve responses for sweet and umami tastes (Figs. 5–7). We observed a trend toward stronger preferences in the KO mice for sweet and umami taste substances in behavioral tests, suggesting a perceptible but minor contribution of *Serca3* in these tastes. To address the disparity in the behavioral responses of the *Serca3* KO mice to bitter versus sweet and umami taste substances, we examined the expression of *Serca2* in taste tissue (Fig. 8). Double immunolabeling of rat CV taste buds showed that *Serca2* is expressed in a subset of *Trpm5*-expressing cells and is almost completely co-expressed with *T1R3* in the same population of cells. Previous studies have shown that *Trpm5* is present in all sweet, umami, and bitter TRCs, while *T1R3* occurs only in sweet and umami TRCs. Thus, our results suggest that *Serca2* is present in sweet and umami TRCs and is likely absent in the bitter receptor cells. Double-immunostaining data with antibodies against *Serca2* and  $\alpha$ -gustducin also support this conclusion: the cells expressing these two proteins only partially overlap (Fig. 8), since  $\alpha$ -gustducin is present in most bitter taste receptor cells but in only a small fraction of *T1R3*-expressing cells in rodent CV papillae [13,51,52]. Therefore, we speculate that the absence of significant alterations in behavioral and nerve responses to sweet and umami taste stimuli in *Serca3* KO mice can be attributed to *Serca2*, which compensates for the lack of *Serca3* function in mutant sweet and umami TRCs.

From our data, we propose the following model. First, bitter taste stimuli activate the taste receptor-G protein-PLC $\beta$ 2-IP $_3$ R3 signaling cascade, as well described previously [2,17,20]. Upon activation, IP $_3$ R3 releases  $\text{Ca}^{2+}$  into the cytoplasm from the ER, where *Serca3* is localized, which leads to an increase of  $[\text{Ca}^{2+}]_c$ , especially in the immediate vicinity of the ER in a short time. This increased  $[\text{Ca}^{2+}]_c$  activates *Serca3*, which begins  $\text{Ca}^{2+}$  uptake into the ER, causing a net decrease in the amount of cytoplasmic  $\text{Ca}^{2+}$  that can be used to activate the downstream signaling molecules, such as *Trpm5*, thus modulating the activity of the downstream taste signaling cascade [12,21]. In *Serca3* deficient bitter TRCs, without such a decrease in  $[\text{Ca}^{2+}]_c$ , higher levels of  $\text{Ca}^{2+}$  may be available for the downstream signaling cascade. The process can increase transmitter release onto the nerve fibers and enhance bitter taste sensation, which in turn engenders a stronger aversive response to the tastants. The stronger aversion to these bitter compounds by the KO mice clearly demonstrates the contribution of a  $\text{Ca}^{2+}$  clearance mechanism in animal taste perception. In sweet and umami TRCs, both *Serca2* and *Serca3* can be involved in cytoplasmic  $\text{Ca}^{2+}$  uptake. And *Serca2* may partially compensate the role of *Serca3* in these cells, leading to statistically insignificant but perceptible increases in the responses of the KO mice to these palatable taste stimuli.

Further studies on taste bud cell responses upon taste stimuli can quantitatively characterize the effect of *Serca3* mutation on kinetics of calcium responses in taste bud cells and its correlation with the altered gustatory nerve responses and, eventually, with the perception and behavioral responses. Unlike other KO mouse models such as *T1R3* or *Trpm5* KO that abolish nearly all responses to specific taste qualities [12,17,53,54], *Serca3* KO mice provide a distinct model with a gradual change in taste reception. Additional data from such mouse models may further our understanding of how the central nervous system translates qualitative and quantitative sensory information into perception.

Our results illustrate that despite many commonalities in the sweet, umami, and bitter taste signaling pathways, different  $\text{Ca}^{2+}$  clearance/taste signal regulation mechanisms may be used by the TRCs for these three tastes. This notion is supported by a recent report describing the possible role of another calcium-signaling-related protein, calcium- and integrin-binding protein 1 (CIB1), in sweet TRCs [55].

It is also noteworthy that most of Serca2 proteins appeared to be located in the ER regions closer to the taste pore relative to the nucleus, which may have functional implications. It is possible that the proximately situated pumps can more rapidly respond to the signaling cascades initiated by the activated taste receptors at the taste pore. The exact contribution of Serca2 to taste signal processing in taste bud cells can be further revealed by studies with Serca2 KO mice. However, the systemic knockout of this gene turned out to be embryonic lethal [56]. Generation and characterization of a taste-cell-specific Serca2 KO mouse can further define Serca2's function in taste perception and may provide novel insights into taste signal regulation mechanisms.

In summary, our findings show that sweet, umami, and bitter TRCs possess different  $\text{Ca}^{2+}$  clearance machineries and that mutations in these proteins can alter taste perception.

## Materials and Methods

### Animals

FVB/NJ (WT) mice and CB6-Tg(Gad1-EGFP)G42Zjh/J transgenic mice (referred to as Gad1-GFP mice throughout) were purchased from the Jackson Laboratory (Bar Harbor, ME). Serca3 knockout (KO) mice [47] and Trpm5-GFP transgenic mice [40] were bred and maintained at the Monell Chemical Senses Center animal facility. Trpm5-GFP transgenic mice carry a green fluorescent protein (GFP) transgene driven by Trpm5 (transient receptor potential cation channel, subfamily M, member 5) promoter. All procedures involving animals were approved by the Monell Chemical Senses Center Institutional Animal Care and Use Committee.

### Construction of the subtracted single-taste-cell library

To isolate the genes that are selectively or preferentially expressed in sweet, umami, or bitter taste receptor cells (TRCs), we generated rat subtracted single-TRC cDNA libraries. First, we performed single-taste-cell transcriptome amplification as described previously [18]. Briefly, a rat tongue was removed, and Tyrode's solution containing 2 mg/ml dispase II and 1 mg/ml collagenase was subepithelially injected into the tongue, which was then incubated at 25°C for 30 min. The lingual epithelium was peeled off from the rest of the tongue, and circumvallate (CV) and foliate taste papillae were excised and dissociated into individual cells. Taste bud cells were identified based on their bipolar shape and individually transferred into 0.5-ml tubes. First-strand cDNA was synthesized with reverse transcriptase (Invitrogen, Carlsbad, CA) and oligo(dT) primers, tailed with dATP and terminal transferase (Roche Applied Science, Indianapolis, IN), and then amplified with oligo(dT) primers. Aliquots of the amplified products were used for *post hoc* cell typing by quantitative real-time PCR (qPCR) with Power SYBR Green Master Mix (Applied Biosystems, Foster City, CA) and specific PCR primers for known cell-type marker genes (see Table S1): ectonucleoside triphosphate diphosphohydrolase 2 (*Entpd2*) for type I cells [4]; *Trpm5* and *Tas1r1* and *Tas1r2* (taste receptor, type 1, member 1 and member 2) for all sweet/umami/bitter-, umami-, and sweet-sensing TRCs (or type II cells), respectively [9,10,12]; and *Snap25* (synaptosomal-associated protein 25) for presynaptic (or type III) cells [57].

We then subtracted the amplified products of *Entpd2*-expressing type I taste bud cells from those of a single cell expressing *Trpm5* using a previously published method, with some modification [58]. Briefly, the driver cDNA pooled from rat type I cells was labeled with an equal amount of photobiotin (Sigma, St. Louis, MO) by ultraviolet irradiation in a Stratalinker 2400 crosslinker (Stratagene, Cedar Creek, TX) and then hybridized with tracer cDNA from a single TRC at a ratio of 24:1 (cDNA amount of driver vs. tracer). The mixture was incubated in the hybridization buffer (12.5% PEG8000, 1.5 M NaCl, 10 mM EPPS, pH 8.25, 1 mM EDTA, pH 8.0, and 0.1% SDS) according to the following parameters: 5 min at 80°C, ramp 80°C to 68°C for 16 min, 90 min at 68°C, 10 min at 80°C. The hybrids were then removed with streptavidin and purified with phenol/chloroform extraction. After two rounds of subtraction, the resultant cDNA was further amplified using restriction-enzyme site-tagged oligo(dT) primers and then subcloned into the pBluescript II vector. The sequences of the insert DNA were determined by DNA sequencing analysis and BLAST-searched against the GenBank databases.

### Isolation and expression analysis of Serca3 cDNA

One clone, A14, matched part of the Serca3 cDNA sequence (GenBank accession number NM\_012914.1) [42]. To determine whether Serca3 is selectively expressed in taste tissue, rat and mouse lingual epithelia containing CV and foliate papillae or devoid of any taste buds as negative control were excised, and total RNA was prepared using Absolutely RNA<sup>®</sup> Miniprep Kit (Stratagene), which was reverse transcribed into first-strand cDNA using random primers and the Superscript III kit (Invitrogen). PCR amplification was performed with primers that covered the full coding regions of mouse and rat Serca3 transcripts (see Table S2A). To ensure detection of all expressed splice variants, additional PCR reactions were performed using primers specific for all known variants (see Table S2B). The PCR products were subcloned into pGEM-T Easy (Promega, Madison, WI) or pCR4-TOPO vector (Invitrogen), and the insert DNA was sequenced with the vector primers.

### Immunohistochemistry

Mouse and rat tongue and soft palate were removed and fixed with 4% paraformaldehyde in phosphate-buffered saline (PBS) for 1 h on ice and cryoprotected in 20% sucrose in PBS at 4°C for 2 h and then in 30% sucrose in PBS at 4°C overnight. The regions containing taste papillae (fungiform on the dorsal surface of anterior one-third of the tongue, CV on the dorsal surface of posterior tongue, foliate at the lateral edge of posterior tongue, and soft palate) were excised and embedded in Tissue-Tek<sup>®</sup> OCT compound (Sakura Finetek USA, Inc., Torrance, CA). Frozen sections (10  $\mu\text{m}$  thickness) were obtained using a cryostat and were then permeabilized with PBS-T (0.3% Triton X-100 in PBS) and blocked with the blocking buffer (2% goat serum, 3% BSA, 0.3% Triton X-100, and 0.1% sodium azide in PBS) overnight at 4°C. The sections were incubated with properly diluted primary antibodies at 25°C for 4 h or at 4°C overnight. After six washes with PBS-T for 10 min each, the sections were incubated with secondary antibodies at 25°C for 1 h. The working concentrations and other information about all antibodies used in this study are summarized in Table S3. The sections were thoroughly washed with PBS-T again before being covered with Vectashield H-1000 (Vector Laboratories, Burlingame, CA). Fluorescent images were taken using a confocal microscope (Leica Microsystems Inc., Bannockburn, IL). Control experiments performed without primary antibodies, or with taste tissue sections from Serca3 KO mice, showed neither nonspecific staining of primary antibodies nor cross-reactivity between secondary antibodies, validating

antibody specificity. We verified the reproducibility of the results by performing immunostaining with at least 40 taste tissue sections from five each of WT and *Serca3* KO mice, with total 20 sections from at least 2 mice from each *Trpm5*-GFP and *Gad1*-GFP transgenic line, and with 30 taste tissue sections from three rats for *Serca2* immunostaining experiments.

### Taste solutions

Taste solutions were prepared in deionized water using reagent-grade chemicals purchased from Sigma-Aldrich. All taste stimuli were presented at room temperature.

### Two-bottle taste preference tests

Sex- and age-matched *Serca3* KO and WT control (FVB/NJ) mice (9–10 for each group, except 5 KO mice for NaCl tests) were used for two-bottle taste preference tests as previously described [19,59]. The animals were 7–15 weeks old at the start of each experiment. The mice were given access for 48 h to two bottles, one containing deionized water and the other a tastant solution, and to food ad libitum. After 24 h, intake of each fluid was recorded and the bottle positions were switched to minimize any positional effect. After another 24 h, fluid intake was again recorded. Mice were then given two bottles of deionized water for at least 4 days between different tastant trials.

Each tastant was presented in an ascending concentration series: sweet, 5, 10, 20, 40, and 80 mM sucrose (caloric) and 0.1, 0.3, 1, 3, and 10 mM sodium saccharin (noncaloric artificial sweetener); umami, 0.1, 0.3, 1, 3, and 10 mM monosodium L-glutamate (MSG); bitter, 0.01, 0.03, 0.1, 0.3, 1, and 3 mM denatonium benzoate and 0.01, 0.03, 0.1, 0.3, and 1 mM quinine hydrochloride; sour: 0.1, 0.5, 1, and 2.5 mM citric acid; salty: 37.5, 75, 150, and 300 mM NaCl.

### Brief-access tests

Sex- and age-matched *Serca3* KO and WT control (FVB/NJ) mice (7 for each group) were used for these tests. The animals were 5–7 weeks old at the onset of each experiment. The licking rate of individual mouse presented with a series of different tastants was measured using a Davis MS-160 gustometer (DiLog Instruments, Tallahassee, FL) as previously described [60]. Test stimuli consisted of serial concentrations of: sodium saccharin (0.1, 1, and 10 mM); MSG (1, 3, 10 mM) in the presence of 100  $\mu$ M amiloride and 1 mM inosine monophosphate (IMP); denatonium benzoate (0.1, 0.3, and 1 mM); quinine hydrochloride (0.05, 0.25, and 1 mM); citric acid (1, 3, and 10 mM); and NaCl (0.1, 0.3, and 0.5 M). In order to measure responses to attractive stimuli (saccharin and MSG), mice were fed 1 g food and 1.5 ml water over the 24 h before testing and were tested every second day. For aversive stimuli (denatonium, quinine, citric acid, and NaCl), mice were placed on a 22-h restricted water-access schedule and were tested daily. To ensure adequate sampling, a maximum of five different solutions (including a water control) were presented during a test. Stimulus presentation order was randomized within blocks. The duration of each trial (5 s) was regulated by a computer-controlled shutter that allowed access to the sipper tube with a 10 s inter-presentation interval. A water rinse presentation (1 s) was interspersed between the test trials for the normally avoided stimuli to help control for potential carry-over effects as previously described [61].

### Data analysis

Data from the two-bottle preference tests are presented as percent preference scores, which were calculated using average daily fluid intakes of individual mice: [solution intake/total fluid (solution+water) intake]  $\times$  100. A preference score of 50% indicates

neither preference nor avoidance of the solution compared with water; a score  $>$ 50% suggests preference for the solution, and  $<$ 50% avoidance of the solution, compared with water. For brief-access tests, the average number of licks per trial for each stimulus concentration was divided by the average number of water licks per trial, yielding a tastant/water lick ratio.

Preference scores (two-bottle tests) and tastant/water lick ratio (brief-access tests) were analyzed using a mixed-model analysis of variance (ANOVA), and genotype (between-subjects) and tastant concentration (within-subjects) effects were evaluated. If there was a significant effect, then *post hoc* pairwise comparisons of means at each test solution concentration were conducted with Student *t*-tests between genotype groups (two-tailed unpaired distribution, except for NaCl tests in two-bottle tests, for which a two-sample equal variance was used). All statistical analyses were performed using Microsoft Excel software and the software package Statcel (OMS, Tokyo, Japan). Statistical rejection was set at the 0.05 level for all data analysis.

### Gustatory nerve recordings

The procedures for the mouse glossopharyngeal (GL) nerve recordings were described previously [62]. Briefly, *Serca3* KO and WT control (FVB/NJ) mice (6–8 for each group) were anesthetized with an intraperitoneal injection of sodium pentobarbital (40–50 mg/kg of mouse body weight) and maintained at a surgical level of anesthesia with additional injection of sodium pentobarbital. The trachea of each animal was cannulated, and the mouse was then fixed in the supine position with a head holder. The right GL nerve was exposed by removal of the digastric muscle and posterior horn of the hyoid bone and then dissected free from underlying tissues and cut near its entrance to the posterior lacerated foramen. For whole-nerve recording, the entire nerve was placed on a platinum wire recording electrode. An indifferent electrode was positioned nearby in the wound. Neural responses induced by chemical stimulations of the tongue were fed into an amplifier (Grass Instruments, West Warwick, RI), monitored on an oscilloscope and audiomonitor. Whole nerve responses were integrated with a time constant of 1.0 sec and recorded on a computer for later analysis using PowerLab system (AD Instruments, Colorado Springs, CO).

The solutions used to stimulate the posterior part of the tongue were as follows: sucrose, 0.5 M; mono potassium glutamate (MPG), 0.1 M; denatonium, 0.1, 0.3, 1, and 3 mM; quinine, 0.1, 0.3, 1, and 3 mM; HCl, 10 mM; and NaCl, 0.1 M. The compounds were applied to the tongue for 1 min, followed by rinse with deionized water.

In the data analysis for whole-nerve response to each stimulus, the magnitude of the integrated response at 10, 15, 20, 25, 30, 35, 40, 45, and 50 s after stimulus onset was measured and averaged. Relative response magnitudes (averaged) for each test stimulus were normalized to the response magnitude to 0.1 M  $\text{NH}_4\text{Cl}$ . Genotype differences in responses to compounds tested at single concentrations were assessed using *t*-tests. Responses to compounds tested at multiple concentrations were analyzed using a mixed-model ANOVA assessing effects of genotype (between-subjects factor) and concentration (within-subjects factor). If significant effects were detected using ANOVA, then planned comparison or *post hoc t*-tests were used to compare strain means for specific concentrations. For all tests,  $P < 0.05$  was considered significant.

### Supporting Information

**Table S1 Primers for cell type-specific marker genes used in cell typing qPCR.**  
(DOC)

**Table S2 Primers for Serca3 used in RT-PCR.**  
(DOC)**Table S3 Antibodies.**  
(DOC)**Table S4 ANOVA results for the behavioral tests and the gustatory nerve recordings to taste compounds (WT vs. Serca3 KO mice).**  
(DOC)**Acknowledgments**

We are grateful to Dr. Gary E. Shull (University of Cincinnati, OH, USA) for use of the Serca3 knockout mice and to Dr. Robert F. Margolskee for

**References**

- Lindemann B (2001) Receptors and transduction in taste. *Nature* 413: 219–225.
- Chandrashekar J, Hoon MA, Ryba NJ, Zuker CS (2006) The receptors and cells for mammalian taste. *Nature* 444: 288–294.
- Finger TE (2005) Cell types and lineages in taste buds. *Chem Senses* 30 Suppl 1: i54–55.
- Bartel DL, Sullivan SL, Lavoie EG, Sevigny J, Finger TE (2006) Nucleoside triphosphate diphosphohydrolase-2 is the ecto-ATPase of type I cells in taste buds. *J Comp Neurol* 497: 1–12.
- Chandrashekar J, Kuhn C, Oka Y, Yarmolinsky DA, Hummler E, et al. (2010) The cells and peripheral representation of sodium taste in mice. *Nature* 464: 297–301.
- Lawton DM, Furness DN, Lindemann B, Hackney CM (2000) Localization of the glutamate-aspartate transporter, GLAST, in rat taste buds. *Eur J Neurosci* 12: 3163–3171.
- Vandenbeuch A, Clapp TR, Kinnamon SC (2008) Amiloride-sensitive channels in type I fungiform taste cells in mouse. *BMC Neurosci* 9: 1.
- Li X, Staszewski L, Xu H, Durick K, Zoller M, et al. (2002) Human receptors for sweet and umami taste. *Proc Natl Acad Sci U S A* 99: 4692–4696.
- Nelson G, Chandrashekar J, Hoon MA, Feng L, Zhao G, et al. (2002) An amino-acid taste receptor. *Nature* 416: 199–202.
- Nelson G, Hoon MA, Chandrashekar J, Zhang Y, Ryba NJ, et al. (2001) Mammalian sweet taste receptors. *Cell* 106: 381–390.
- Hoon MA, Adler E, Lindemeier J, Battey JF, Ryba NJ, et al. (1999) Putative mammalian taste receptors: a class of taste-specific GPCRs with distinct topographic selectivity. *Cell* 96: 541–551.
- Zhao GQ, Zhang Y, Hoon MA, Chandrashekar J, Erlenbach I, et al. (2003) The receptors for mammalian sweet and umami taste. *Cell* 115: 255–266.
- Adler E, Hoon MA, Mueller KL, Chandrashekar J, Ryba NJ, et al. (2000) A novel family of mammalian taste receptors. *Cell* 100: 693–702.
- Chandrashekar J, Mueller KL, Hoon MA, Adler E, Feng L, et al. (2000) T2Rs function as bitter taste receptors. *Cell* 100: 703–711.
- Matsunami H, Montmayeur JP, Buck LB (2000) A family of candidate taste receptors in human and mouse. *Nature* 404: 601–604.
- Behrens M, Foerster S, Staehler F, Raguse JD, Meyerhof W (2007) Gustatory expression pattern of the human TAS2R bitter receptor gene family reveals a heterogeneous population of bitter responsive taste receptor cells. *J Neurosci* 27: 12630–12640.
- Zhang Y, Hoon MA, Chandrashekar J, Mueller KL, Cook B, et al. (2003) Coding of sweet, bitter, and umami tastes: different receptor cells sharing similar signaling pathways. *Cell* 112: 293–301.
- Huang L, Shanker YG, Dubauskaite J, Zheng JZ, Yan W, et al. (1999) Ggamma13 colocalizes with gustducin in taste receptor cells and mediates IP3 responses to bitter denatonium. *Nat Neurosci* 2: 1055–1062.
- Wong GT, Gannon KS, Margolskee RF (1996) Transduction of bitter and sweet taste by gustducin. *Nature* 381: 796–800.
- Hisatsune C, Yasumatsu K, Takahashi-Iwanaga H, Ogawa N, Kuroda Y, et al. (2007) Abnormal taste perception in mice lacking the type 3 inositol 1,4,5-trisphosphate receptor. *J Biol Chem* 282: 37225–37231.
- Zhang Z, Zhao Z, Margolskee R, Liman E (2007) The transduction channel TRPM5 is gated by intracellular calcium in taste cells. *J Neurosci* 27: 5777–5786.
- Finger TE, Danilova V, Barrows J, Bartel DL, Vigers AJ, et al. (2005) ATP signaling is crucial for communication from taste buds to gustatory nerves. *Science* 310: 1495–1499.
- Huang YJ, Maruyama Y, Dvoryanchikov G, Pereira E, Chaudhari N, et al. (2007) The role of pannexin 1 hemichannels in ATP release and cell-cell communication in mouse taste buds. *Proc Natl Acad Sci U S A* 104: 6436–6441.
- Romanov RA, Rogachevskaja OA, Bystrova MF, Jiang P, Margolskee RF, et al. (2007) Afferent neurotransmission mediated by hemichannels in mammalian taste cells. *EMBO J* 26: 657–667.
- Huang AL, Chen X, Hoon MA, Chandrashekar J, Guo W, et al. (2006) The cells and logic for mammalian sour taste detection. *Nature* 442: 934–938.
- Huang YA, Maruyama Y, Roper SD (2008) Norepinephrine is coreleased with serotonin in mouse taste buds. *J Neurosci* 28: 13088–13093.
- Huang YA, Maruyama Y, Stimac R, Roper SD (2008) Presynaptic (Type III) cells in mouse taste buds sense sour (acid) taste. *J Physiol* 586: 2903–2912.
- Huang YJ, Maruyama Y, Lu KS, Pereira E, Plonsky I, et al. (2005) Mouse taste buds use serotonin as a neurotransmitter. *J Neurosci* 25: 843–847.
- Ishimaru Y, Inada H, Kubota M, Zhuang H, Tominaga M, et al. (2006) Transient receptor potential family members PKD1L3 and PKD2L1 form a candidate sour taste receptor. *Proc Natl Acad Sci U S A* 103: 12569–12574.
- Kataoka S, Yang R, Ishimaru Y, Matsunami H, Sevigny J, et al. (2008) The candidate sour taste receptor, PKD2L1, is expressed by type III taste cells in the mouse. *Chem Senses* 33: 243–254.
- Tomchik SM, Berg S, Kim JW, Chaudhari N, Roper SD (2007) Breadth of tuning and taste coding in mammalian taste buds. *J Neurosci* 27: 10840–10848.
- Arrenius S, Zhivotovsky B, Nicotera P (2003) Regulation of cell death: the calcium-apoptosis link. *Nat Rev Mol Cell Biol* 4: 552–565.
- Roper SD (2007) Signal transduction and information processing in mammalian taste buds. *Pflügers Arch* 454: 759–776.
- DeFazio RA, Dvoryanchikov G, Maruyama Y, Kim JW, Pereira E, et al. (2006) Separate populations of receptor cells and presynaptic cells in mouse taste buds. *J Neurosci* 26: 3971–3980.
- Medler KF, Margolskee RF, Kinnamon SC (2003) Electrophysiological characterization of voltage-gated currents in defined taste cell types of mice. *J Neurosci* 23: 2608–2617.
- Medler KF (2010) Calcium Signaling in Taste Cells: Regulation Required. *Chem Senses* 35: 753–765.
- Hacker K, Medler KF (2008) Mitochondrial calcium buffering contributes to the maintenance of Basal calcium levels in mouse taste cells. *J Neurophysiol* 100: 2177–2191.
- Laskowski AI, Medler KF (2009) Sodium-calcium exchangers contribute to the regulation of cytosolic calcium levels in mouse taste cells. *J Physiol* 587: 4077–4089.
- Szebenyi SA, Laskowski AI, Medler KF (2010) Sodium/calcium exchangers selectively regulate calcium signaling in mouse taste receptor cells. *J Neurophysiol* 104: 529–538.
- Clapp TR, Medler KF, Damak S, Margolskee RF, Kinnamon SC (2006) Mouse taste cells with G protein-coupled taste receptors lack voltage-gated calcium channels and SNAP-25. *BMC Biol* 4: 7.
- Richter TA, Caicedo A, Roper SD (2003) Sour taste stimuli evoke Ca<sup>2+</sup> and pH responses in mouse taste cells. *J Physiol* 547: 475–483.
- Burk SE, Lytton J, MacLennan DH, Shull GE (1989) cDNA cloning, functional expression, and mRNA tissue distribution of a third organellar Ca<sup>2+</sup> pump. *J Biol Chem* 264: 18561–18568.
- Bobe R, Bredoux R, Corvazier E, Lacabaratz-Porret C, Martin V, et al. (2005) How many Ca<sup>2+</sup>/ATPase isoforms are expressed in a cell type? A growing family of membrane proteins illustrated by studies in platelets. *Platelets* 16: 133–150.
- Ango F, di Cristo G, Higashiyama H, Bennett V, Wu P, et al. (2004) Ankyrin-based subcellular gradient of neurofascin, an immunoglobulin family protein, directs GABAergic innervation at purkinje axon initial segment. *Cell* 119: 257–272.
- Seta Y, Kataoka S, Toyono T, Toyoshima K (2007) Immunohistochemical localization of aromatic L-amino acid decarboxylase in mouse taste buds and developing taste papillae. *Histochem Cell Biol* 127: 415–422.
- Perez CA, Huang L, Rong M, Kozak JA, Preuss AK, et al. (2002) A transient receptor potential channel expressed in taste receptor cells. *Nat Neurosci* 5: 1169–1176.
- Liu LH, Paul RJ, Sutliff RL, Miller ML, Lorenz JN, et al. (1997) Defective endothelium-dependent relaxation of vascular smooth muscle and endothelial cell Ca<sup>2+</sup> signaling in mice lacking sarco(endo)plasmic reticulum Ca<sup>2+</sup>-ATPase isoform 3. *J Biol Chem* 272: 30538–30545.
- Martin V, Bredoux R, Corvazier E, Van Gorp R, Kovacs T, et al. (2002) Three novel sarco/endooplasmic reticulum Ca<sup>2+</sup>-ATPase (SERCA) 3 isoforms.

use of Trpm5-GFP transgenic mice and anti-Trmp5 and anti-T1R3 antibodies. We thank Drs. Alexander A. Bachmanov, Bruce Bryant, Hong Wang, and Ichiro Matsumoto for valuable discussions and Mr. Minliang Zhou for excellent technical support.

**Author Contributions**

Conceived and designed the experiments: LH PZ NI JPS TO. Performed the experiments: NI TO JPS. Analyzed the data: LH NI TO JPS PZ. Contributed reagents/materials/analysis tools: LH NI TO JPS. Wrote the paper: NI LH TO PZ JPS.

- Expression, regulation, and function of the membranes of the SERCA3 family. *J Biol Chem* 277: 24442–24452.
49. Chandrasekera PC, Kargacin ME, Deans JP, Lytton J (2009) Determination of apparent calcium affinity for endogenously expressed human sarco(endo)plasmic reticulum calcium-ATPase isoform SERCA3. *Am J Physiol Cell Physiol* 296: C1105–1114.
  50. Ogura T, Kinnamon SC (1999) IP(3)-Independent release of Ca(2+) from intracellular stores: A novel mechanism for transduction of bitter stimuli. *J Neurophysiol* 82: 2657–2666.
  51. Shindo Y, Miura H, Carninci P, Kawai J, Hayashizaki Y, et al. (2008) G alpha14 is a candidate mediator of sweet/umami signal transduction in the posterior region of the mouse tongue. *Biochem Biophys Res Commun* 376: 504–508.
  52. Tizzano M, Dvoryanchikov G, Barrows JK, Kim S, Chaudhari N, et al. (2008) Expression of Galphal4 in sweet-transducing taste cells of the posterior tongue. *BMC Neurosci* 9: 110.
  53. Damak S, Rong M, Yasumatsu K, Kokrashvili Z, Perez CA, et al. (2006) Trpm5 null mice respond to bitter, sweet, and umami compounds. *Chem Senses* 31: 253–264.
  54. Damak S, Rong M, Yasumatsu K, Kokrashvili Z, Varadarajan V, et al. (2003) Detection of sweet and umami taste in the absence of taste receptor T1r3. *Science* 301: 850–853.
  55. Hennings JK, Burhenne N, Stahler F, Winnig M, Walter B, et al. (2008) Sweet taste receptor interacting protein CIB1 is a general inhibitor of InsP3-dependent Ca2+ release in vivo. *J Neurochem* 106: 2249–2262.
  56. Periasamy M, Reed TD, Liu LH, Ji Y, Loukianov E, et al. (1999) Impaired cardiac performance in heterozygous mice with a null mutation in the sarco(endo)plasmic reticulum Ca2+-ATPase isoform 2 (SERCA2) gene. *J Biol Chem* 274: 2556–2562.
  57. Yang R, Crowley HH, Rock ME, Kinnamon JC (2000) Taste cells with synapses in rat circumvallate papillae display SNAP-25-like immunoreactivity. *J Comp Neurol* 424: 205–215.
  58. Weaver DL, Nunez C, Brunet C, Bostock V, Brady G (1999) Single-cell RT-PCR cDNA subtraction. *Methods Mol Biol* 97: 601–609.
  59. Bachmanov AA, Li X, Reed DR, Ohmen JD, Li S, et al. (2001) Positional cloning of the mouse saccharin preference (Sac) locus. *Chem Senses* 26: 925–933.
  60. Glendinning JI, Gresack J, Spector AC (2002) A high-throughput screening procedure for identifying mice with aberrant taste and oromotor function. *Chem Senses* 27: 461–474.
  61. Shin YK, Martin B, Golden E, Dotson CD, Maudsley S, et al. (2008) Modulation of taste sensitivity by GLP-1 signaling. *J Neurochem* 106: 455–463.
  62. Cartoni C, Yasumatsu K, Ohkuri T, Shigemura N, Yoshida R, et al. (2010) Taste preference for fatty acids is mediated by GPR40 and GPR120. *J Neurosci* 30: 8376–8382.
